# Supplementary material for: Divergent Leaf Morpho-Physiological and Anatomical Adaptations of Four Lettuce Cultivars in Response to Different Greenhouse Irradiance Levels in Early Summer Season
Source: MDPI journal article supplement (doi:10.3390/plants10061179), 2021-06-09
Supplement: s1 [file s1]

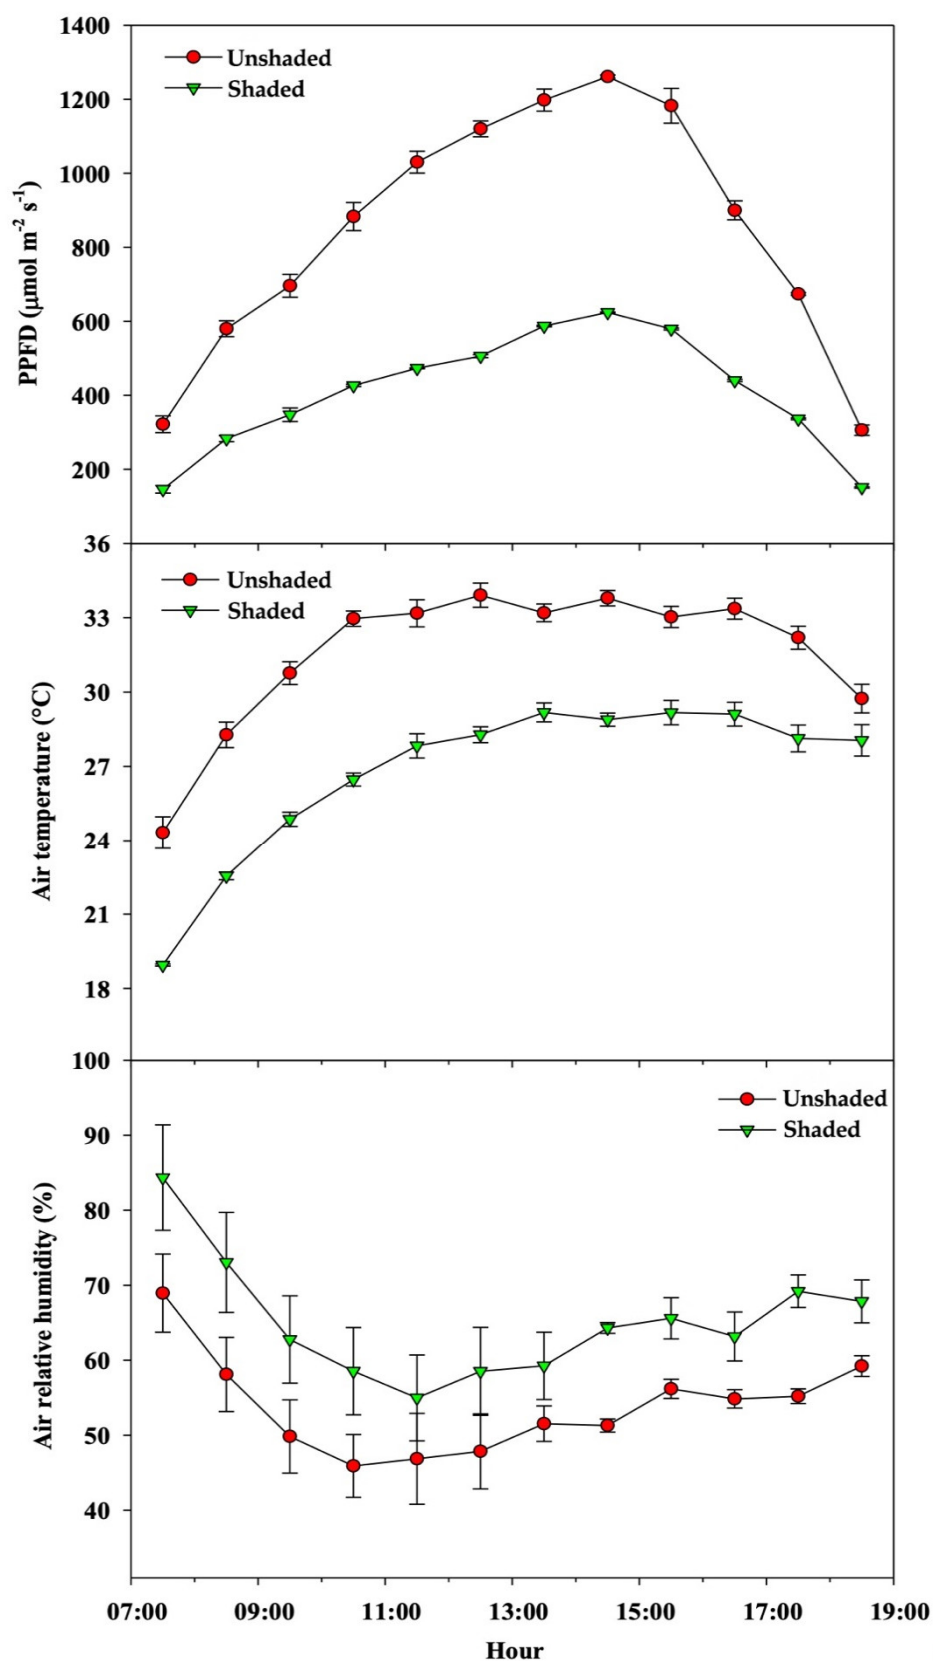

**Figure S1.** Photosynthetic Photon Flux Density (PPFD), average air temperature, and air relative humidity recorded during the growing season at the experimental site under shaded and unshaded conditions.

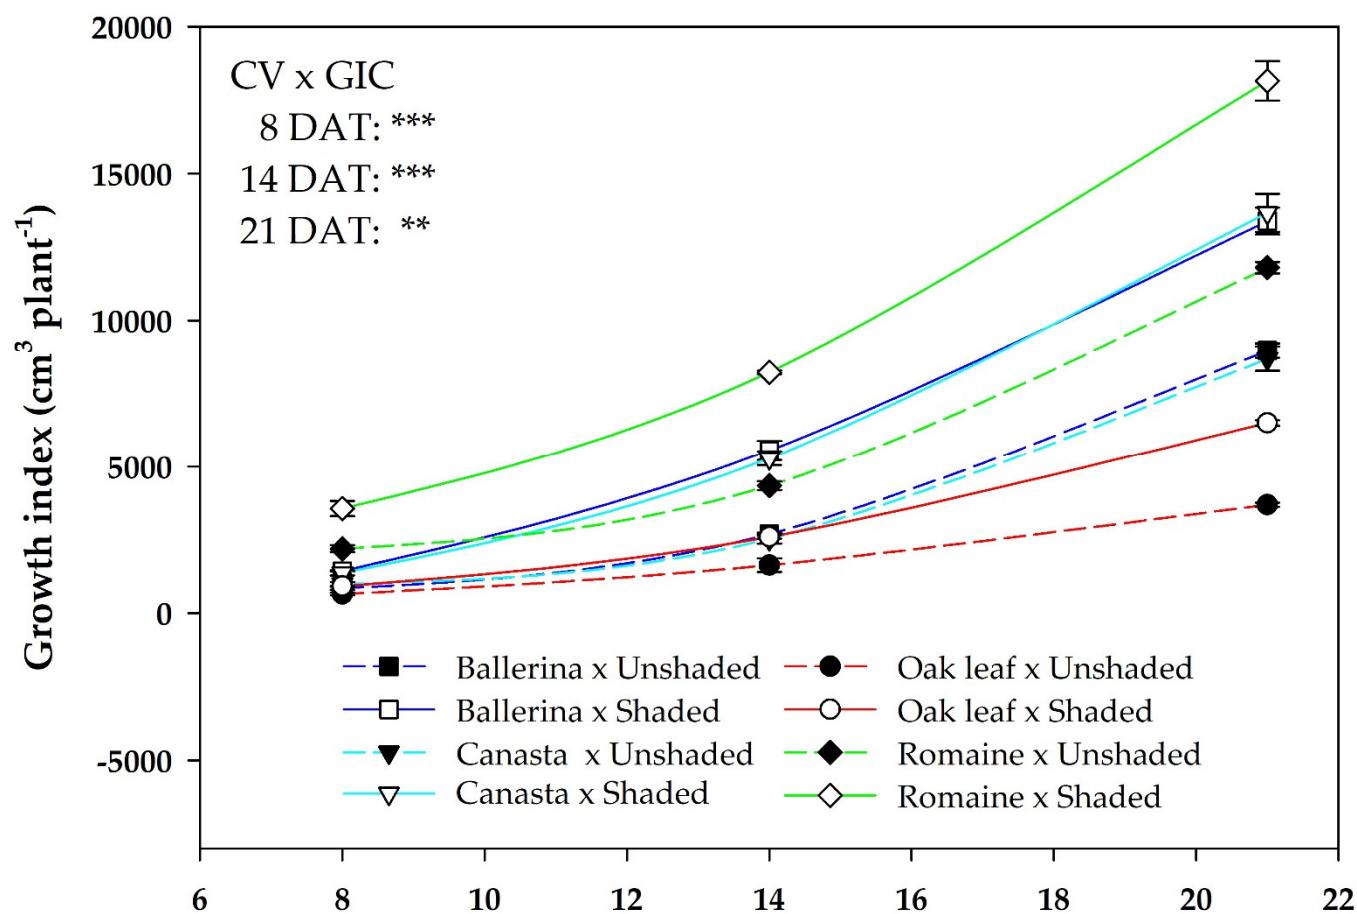

**Figure S2.** Interaction between Cultivar (CV) and Greenhouse Light Conditions (GLC) on plant growth trend quantified through growth index ( $\text{cm}^3 \text{ plant}^{-1}$ ) at different days after transplant. Data are mean values  $\pm$  standard error,  $n = 3$ . Mean comparisons were performed by Duncan's Multiple Range Test for CV and by t-Test for GLC. Different letters within columns indicate significant mean differences. \*\* and \*\*\* denote significant effects at  $p \leq 0.01$  and  $0.001$ , respectively.
